# Supplementary material for: Gene expression in human brain implicates sexually dimorphic pathways in autism spectrum disorders
Source: PubMed Central journal article supplement (PMC4762891; doi:10.1038/ncomms10717), 2016-02-19
Supplement: ncomms10717-s1.pdf [file ncomms10717-s1.pdf]

# Supplementary Figure-1

## a Adult from BrainSpan, RNA-seq

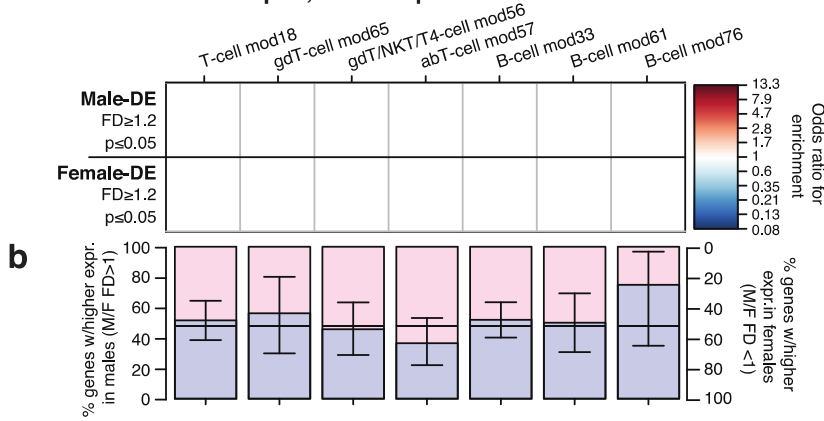

## c Adult from replication data set, RNA-seq

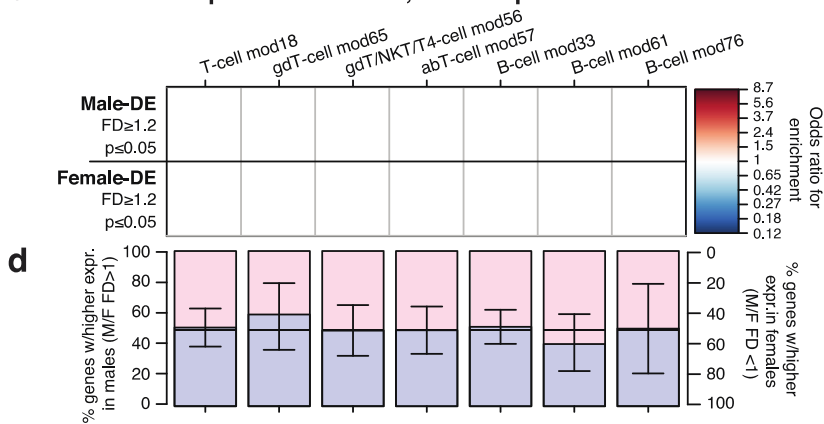

## e Prenatal from BrainSpan, array

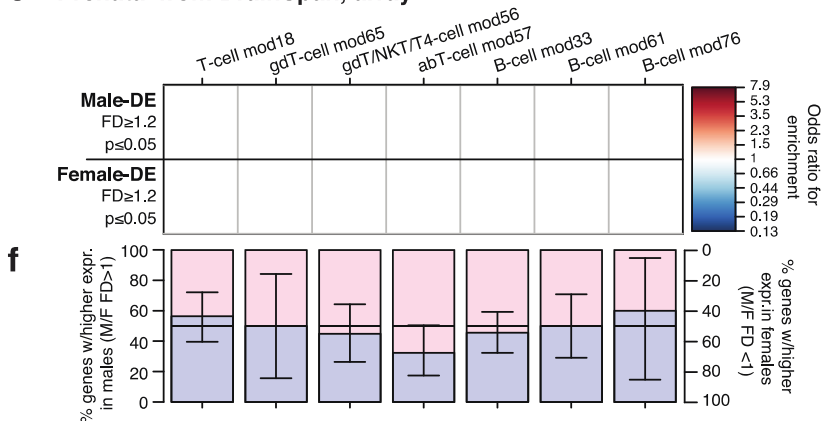

### Supplementary Figure 1: Enrichment and sex-differential expression skew for gene sets marking T- and B-cells. (a,c,d)

Enrichment for co-expression modules associated with T- and B-cell lineage regulators within male-DE and female-DE gene sets by Fisher's exact test from (a) adult samples from BrainSpan (439 male-DE and 427 female-DE genes), (c) adult samples from the replication set (268 male-DE and 251 female-DE genes), and (e) prenatal samples (509 male-DE and 528 female-DE genes); circle size and color indicate the odds ratio of all significant overlaps (Bonferroni-adjusted p-value <0.05), overlaid text displays the adjusted p-value for each enrichment. (b,d,f) Shifts in the distribution of sex-differential expression direction for genes in each T- and B-cell-associated module in (b) adult samples from BrainSpan, (d) adult samples from the replication set, and (f) prenatal samples from BrainSpan. Blue and pink bars display the proportions of each gene set that have higher expression in males (FD>1) or females (FD<1); whiskers note 95% confidence intervals; horizontal black lines note the proportion of male- and female-higher genes in the corresponding background gene set. Overlaid text displays significant Bonferroni-adjusted p-values from the binomial test. gdT-cell, gamma delta T-cell; NKT, natural killer T-cell; abT, alpha beta T-cell.

## Supplementary Figure-2

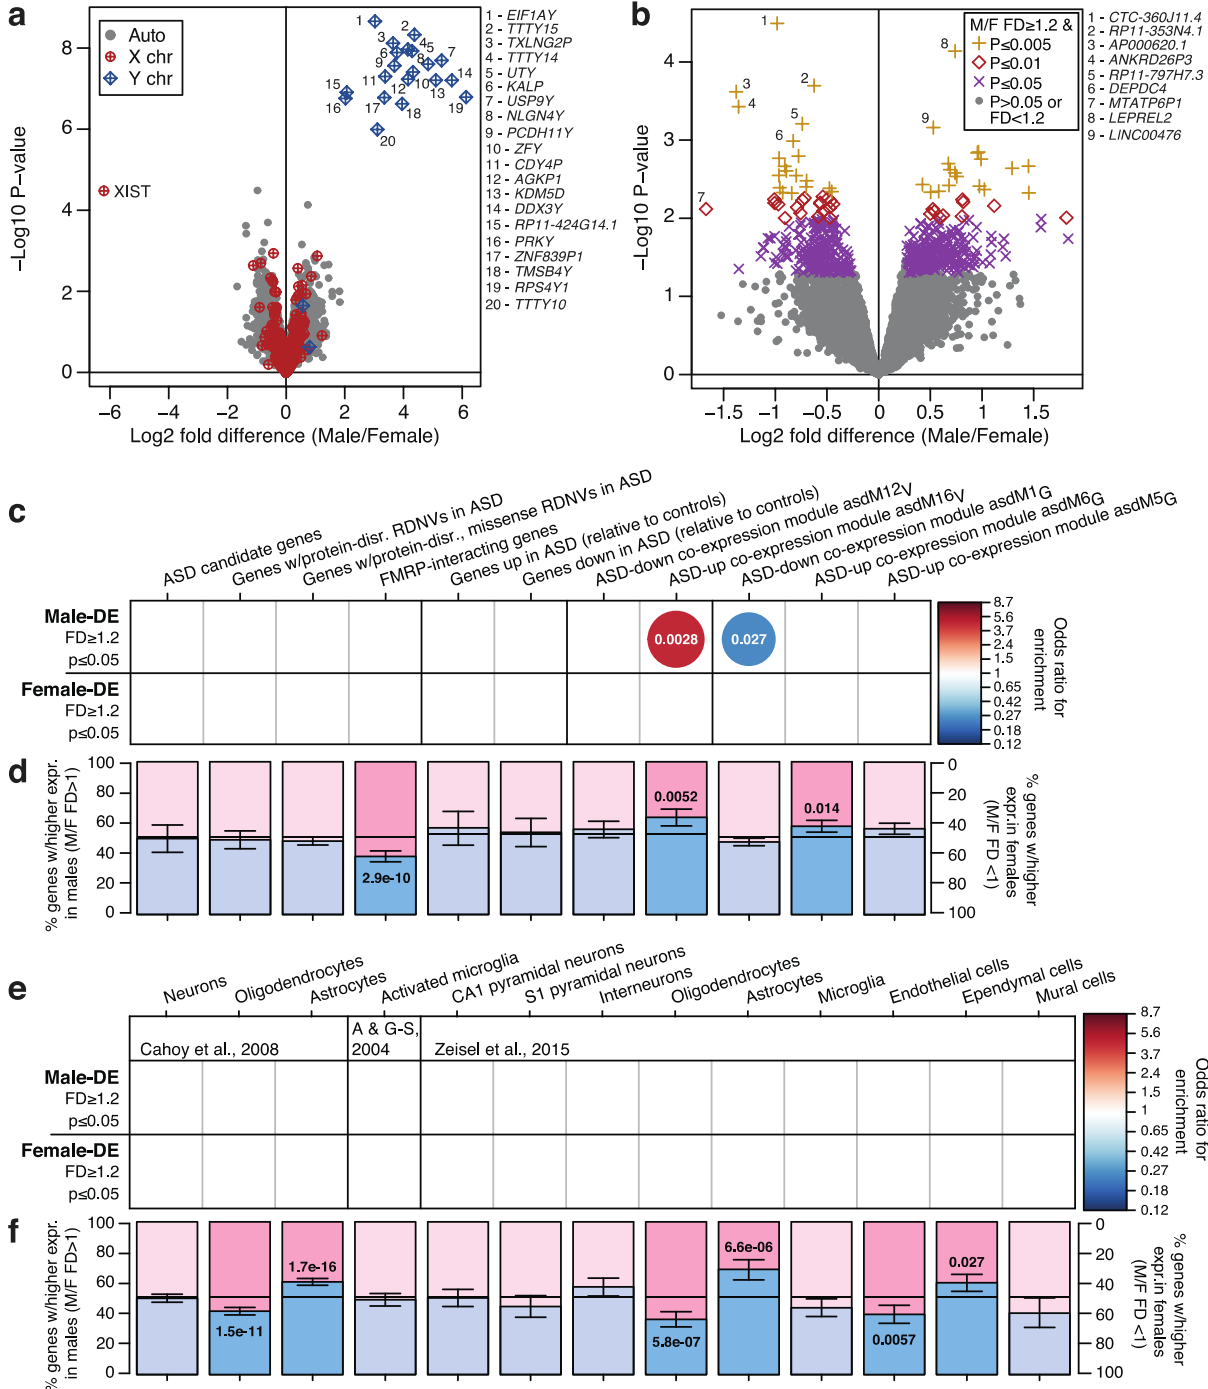

### Supplementary Figure 2: Sex-differential gene expression in adult cortex from an independent, replication sample. (a)

Volcano plot for all 19,354 transcripts expressed in the replication sample (n male=7 samples from 5 subjects; n female=6 samples from 5 subjects). (b) Subset of the plot in a for the 18,676 autosomal transcripts. (c) Enrichment for ASD risk genes and ASD-associated gene expression patterns, and (e) neural cell type markers, within male-DE (268 genes) and female-DE (251 genes) gene sets by Fisher's exact test; circle size and color indicate the odds ratio of all significant overlaps (Bonferroni-adjusted p-value  $< 0.05$ ), overlaid text displays the adjusted p-value for each enrichment. (d) Shifts in the distribution of sex-differential expression direction for genes in each ASD risk or ASD expression sets, and (f) neural cell type markers. Blue and pink bars display the proportions of each gene set that have higher expression in males (FD  $> 1$ ) or females (FD  $< 1$ ); whiskers note 95% confidence intervals; horizontal black lines note the proportion of male- and female-higher genes in the corresponding background gene set. Overlaid text displays significant Bonferroni-adjusted p-values from the binomial test. M, Male; F, Female; RDNVs, rare de novo variants.

**Supplementary Table 1: Sample information for adult and prenatal data sets**

| Data set               | Subject | Sex | Age (years or PCW) | Ethn. | Hemi.       | Site/Brain bank | pH            | PMI (hours)    | N cortex samples |
|------------------------|---------|-----|--------------------|-------|-------------|-----------------|---------------|----------------|------------------|
| BrainSpan, Adult       | HSB124  | F   | 13                 | A     | R           | Yale            | 6.34          | 19.5           | 3                |
|                        | HSB119  | M   | 15                 | A     | L           | USC             | 6.93          | 14.5           | 3                |
|                        | HSB105  | M   | 18                 | E     | L           | USC             | 6.21          | 28             | 1                |
|                        | HSB127  | F   | 19                 | E     | L           | Yale            | 5.91          | 9.5            | 3                |
|                        | HSB130  | F   | 21                 | E     | L           | Yale            | 6.81          | 18             | 10               |
|                        | HSB136  | M   | 23                 | A     | R           | USC             | 6.36          | 10.5           | 9                |
|                        | HSB126  | F   | 30                 | E     | R           | Yale            | 6.92          | 9.5            | 8                |
|                        | HSB145  | M   | 36                 | E     | R           | Yale            | NK, imp. 6.52 | 18             | 9                |
|                        | HSB123  | M   | 37                 | A     | R           | Yale            | 6.37          | 13             | 7                |
|                        | HSB135  | F   | 40                 | A     | R           | USC             | 6.82          | 30.5           | 5                |
| Replication set, Adult | UMB5168 | F   | 16                 | NK    | NK          | NICHD-BTB       | NK            | NK (imp 23.17) | 1                |
|                        | AN17425 | M   | 16                 | NK    | NK          | Harvard-ATP     | NK            | 26.16          | 2                |
|                        | AN19760 | M   | 28                 | NK    | NK          | Harvard-ATP     | NK            | 23.25          | 1                |
|                        | AN15566 | F   | 32                 | NK    | NK          | Harvard-ATP     | NK            | 28.92          | 1                |
|                        | UMB5079 | M   | 33                 | NK    | NK          | NICHD-BTB       | NK            | NK (imp 23.17) | 2                |
|                        | AN08161 | F   | 36                 | NK    | NK          | Harvard-ATP     | NK            | 23.83          | 2                |
|                        | AN10679 | F   | 41                 | NK    | NK          | Harvard-ATP     | NK            | 14             | 1                |
|                        | AN01410 | M   | 41                 | NK    | NK          | Harvard-ATP     | NK            | 27.17          | 1                |
|                        | AN15088 | F   | 52                 | NK    | NK          | Harvard-ATP     | NK            | 17.88          | 1                |
| AN01125                | M       | 56  | NK                 | NK    | Harvard-ATP | NK              | 24.17         | 1              |                  |
| BrainSpan, Prenatal    | HSB154  | M   | 16                 | A/E   | R           | NA              | 6.44          | 3              | 7                |
|                        | HSB96   | M   | 16                 | H     | L&R         | NA              | 6.51          | 2              | 9                |
|                        | HSB97   | F   | 17                 | E     | R           | NA              | 6.51          | 1              | 7                |
|                        | HSB100  | F   | 19                 | A     | L&R         | NA              | 6.56          | 4              | 9                |
|                        | HSB107  | F   | 21                 | E     | L&R         | NA              | 6.61          | 20             | 18               |
|                        | HSB99   | F   | 21                 | As    | L&R         | NA              | 6.51          | 2              | 9                |
|                        | HSB92   | M   | 21                 | A     | R           | NA              | 6.65          | 4              | 9                |
|                        | HSB159  | M   | 22                 | E     | L&R         | NA              | 6.58          | 2              | 18               |

M, Male; F, Female; PCW, post-conception weeks; PMI, post-mortem interval; L, left; R, right; A, African American; E, European; H, Hispanic; As, Asian; NK, not known; imp, imputed.
